# Supplementary material
Source: PubMed Central journal article supplement (PMC4382228)
Supplement: JCI77172sd.pdf [file JCI77172sd.pdf]

## Arcuate nucleus glucokinase regulates glucose intake

Syed Hussain<sup>1†</sup>, Errol Richardson<sup>1,2,†</sup>, Yue Ma<sup>1</sup>, Christopher Holton<sup>1</sup>, Ivan De Backer<sup>1</sup>, Niki Buckley<sup>1,3</sup>, Waljit Dhillon<sup>1</sup>, Gavin Bewick<sup>1,4</sup>, Shuai Zhang<sup>5</sup>, David Carling<sup>5</sup>, Steve Bloom<sup>1\*</sup>, James Gardiner<sup>1</sup>

### Supplementary Figure 1

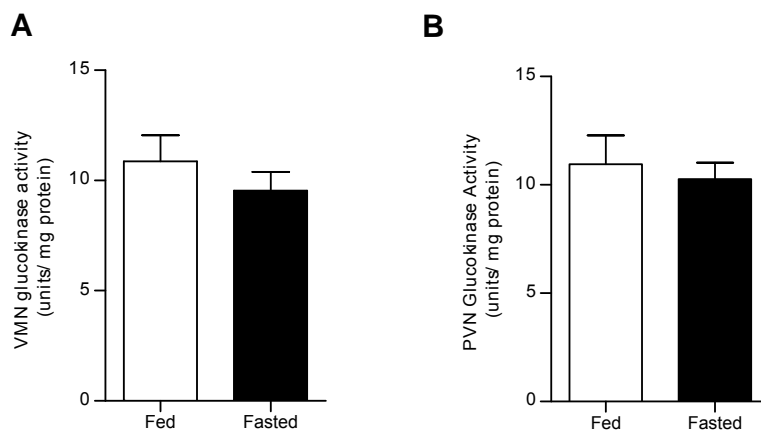

### Supplementary Figure 1. Effect of nutritional state on VMN and PVN glucokinase activity

**(A)** Glucokinase activity in homogenate supernatants from the VMN of chow-fed and 24 hour fasted rats (n=10) and **(B)** PVN of chow-fed and 24 hour fasted rats (n=8-9).

Data presented as mean  $\pm$  s.e.m.

## Supplementary Figure 2

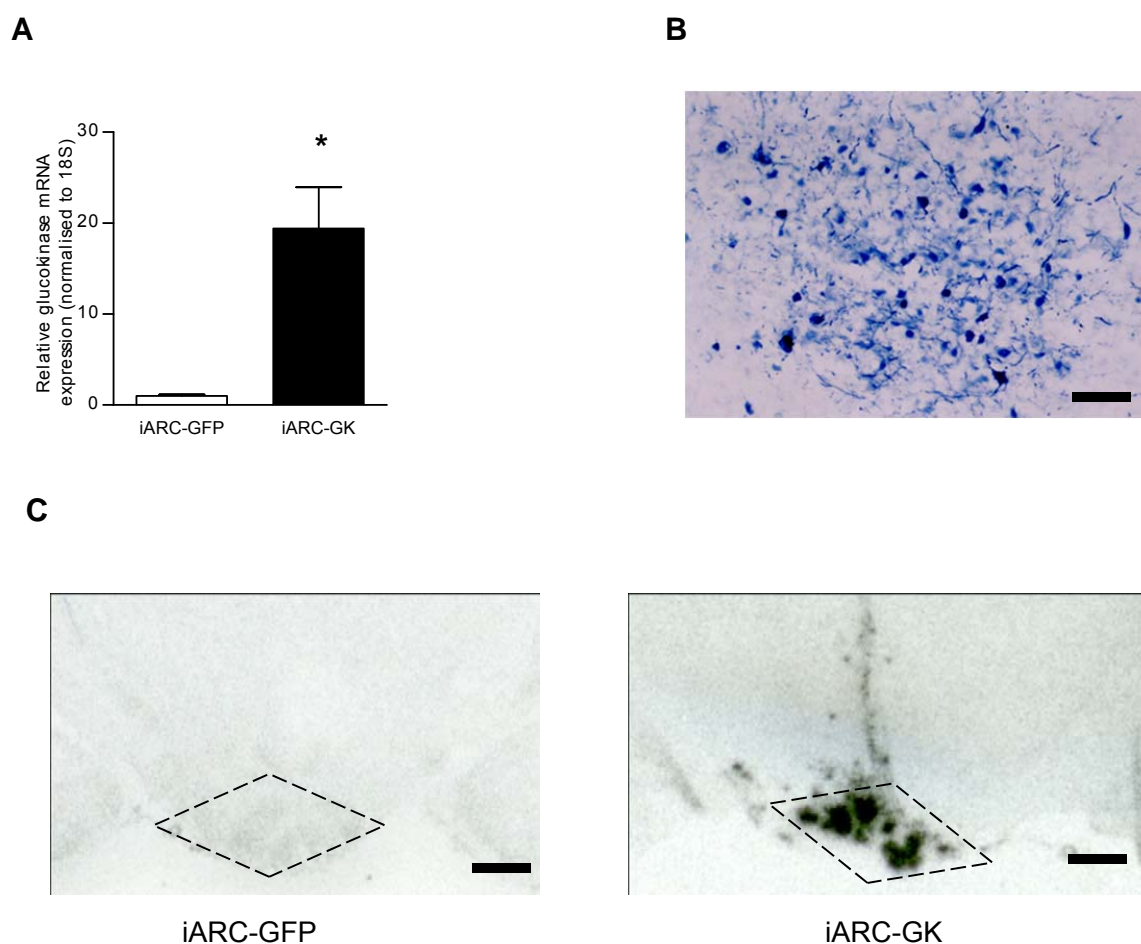

**Supplementary Figure 2.** Hypothalamic glucokinase mRNA expression following stereotactic injection of rAAV-GK into the arcuate nucleus of male Wistar rats

**(A)** Relative hypothalamic glucokinase mRNA expression in iARC-GFP and iARC-GK rats (n=9-12).

**(B)** Immunocytochemical detection of GFP in the arcuate nucleus in iARC-GFP rat. Scale bar = 20µm

**(C)** In-situ hybridization of hypothalamic glucokinase mRNA in chow-fed iARC-GFP and iARC-GK rats (darkfield photomicrograph of 35S-silvergrains). Dashed area indicates approximate location of the ARC. Scale bar = 1mm.

Data presented as mean  $\pm$  s.e.m. \*\*P<0.01 versus control.

### Supplementary Figure 3

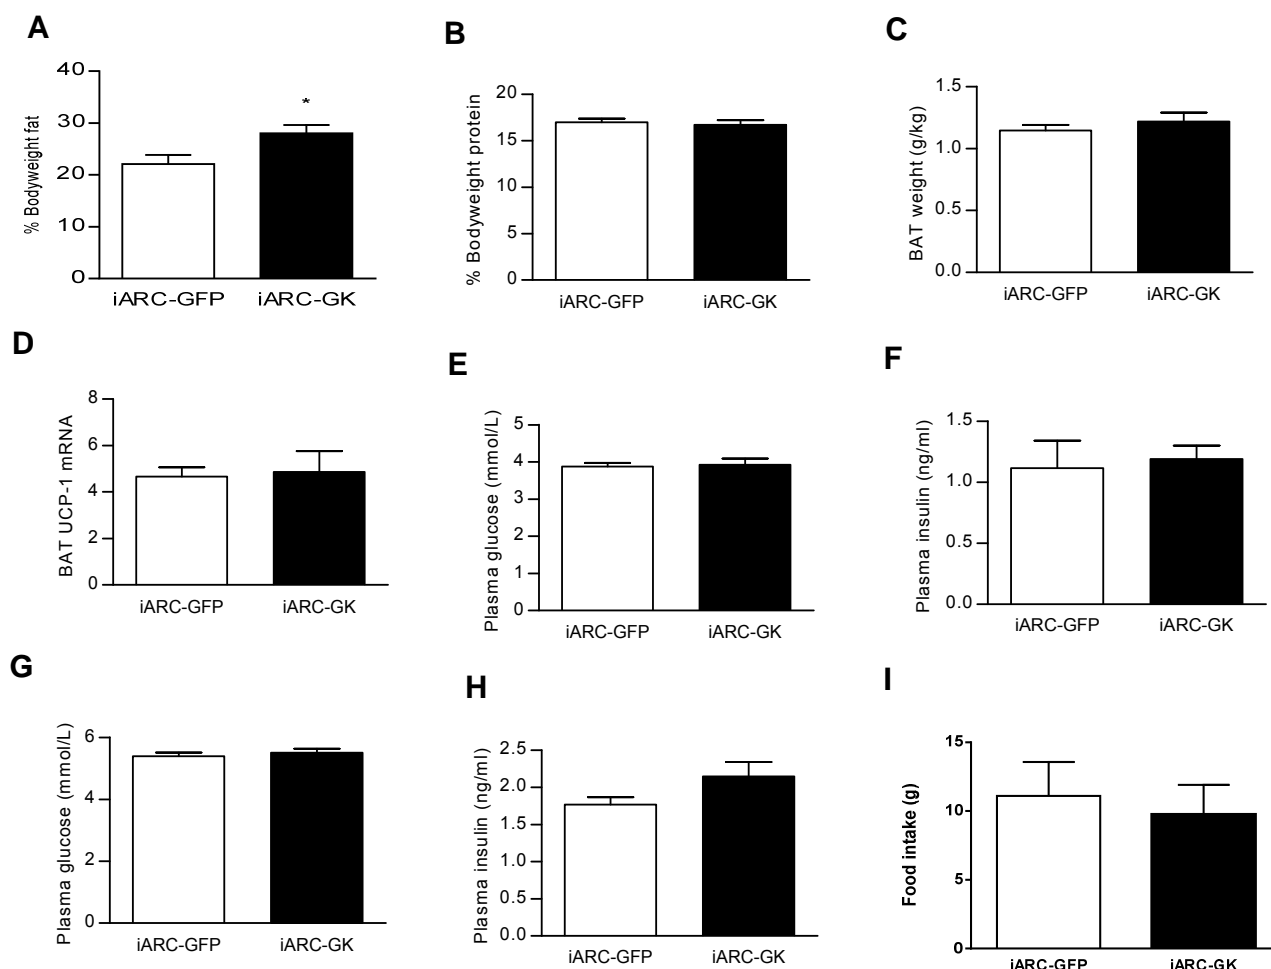

**Supplementary Figure 3.** Effect of increased arcuate nucleus glucokinase on body composition, BAT, glucose homeostasis and fasting induced food intake.

**(A)** Percentage body fat measured using body composition analysis in iARC-GFP and iARC-GK rats on normal chow diet for 33 days after recovery from surgery (n=12-15); **(B)** Percentage body protein measured using body composition analysis in iARC-GFP and iARC-GK rats on normal chow diet for 33 days after recovery from surgery (n=12-15). ; **(C)** BAT weight corrected to bodyweight (n=10-13); **(D)** UCP-1 BAT mRNA expression normalised to 28S ribosomal RNA in iARC-GFP and iARC-GK rats on normal chow diet for 33 days after recovery from surgery (n=6-11). fasting plasma insulin, **(E)** fasting plasma glucose fed plasma glucose and **(F)** fasting plasma insulin **(G)** fed plasma glucose; and **(H)** fed plasma insulin in iARC-GFP and iARC-GK rats on normal chow diet (n=9-13). **(I)** 2 hour food intake following 48 hour fast(n=12-15). Data presented as mean  $\pm$  s.e.m.

# Supplementary Figure 4

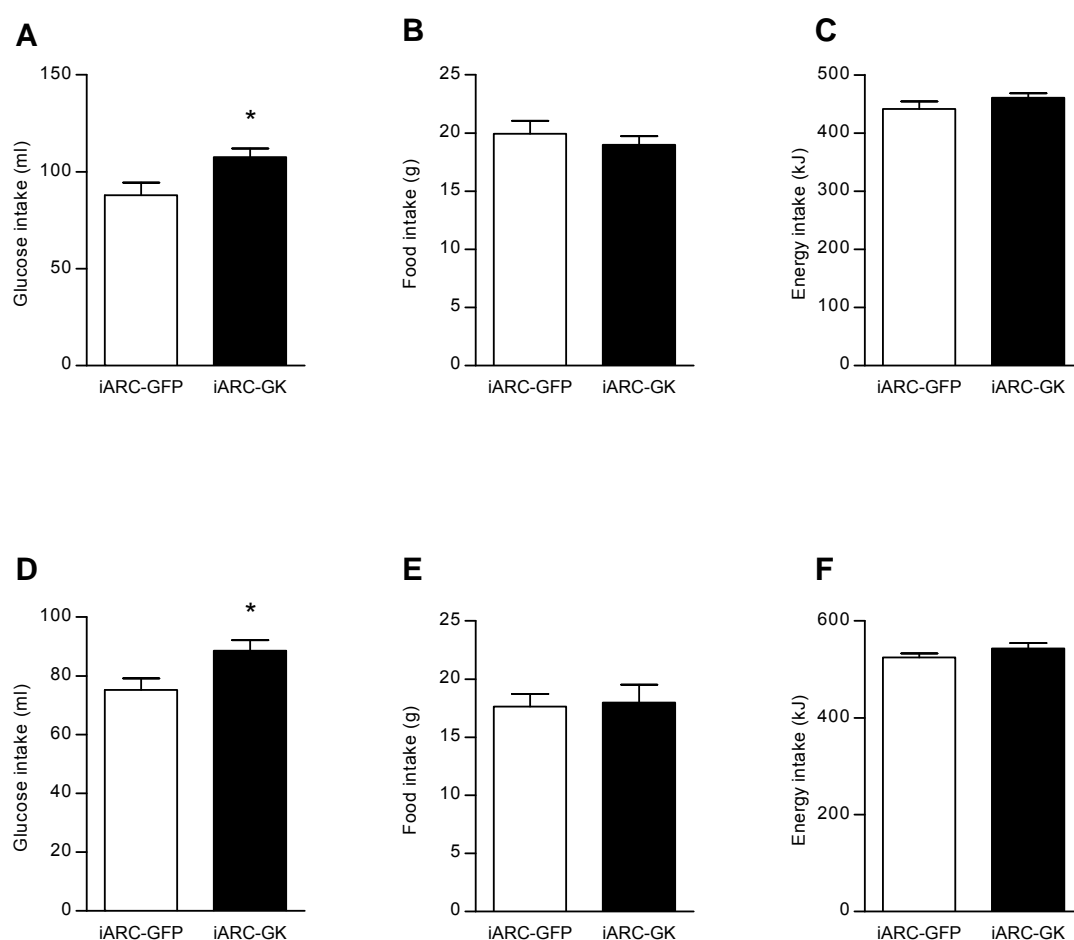

**Supplementary Figure 4.** Effect of increased arcuate nucleus glucokinase activity on food intake and glucose appetite with ad libitum access to normal chow diet and 10% glucose solutions

**(A)** Glucose, **(B)** food and **(C)** energy intake in iARC-GFP (filled circles) or iARC-GK (open squares) rats after 24 hours during a 24-hour feeding study with ad libitum 10% glucose and normal chow intake (n=7).

**(D)** Glucose, **(E)** food and **(F)** energy intake in iARC-GFP (filled circles) or iARC-GK (open squares) rats after 24 hours during a 24-hour feeding study with ad libitum 20% glucose and normal chow intake (n=8).

Data presented as mean  $\pm$  s.e.m. \*P<0.05 versus corresponding control values.

# Supplementary figure 5

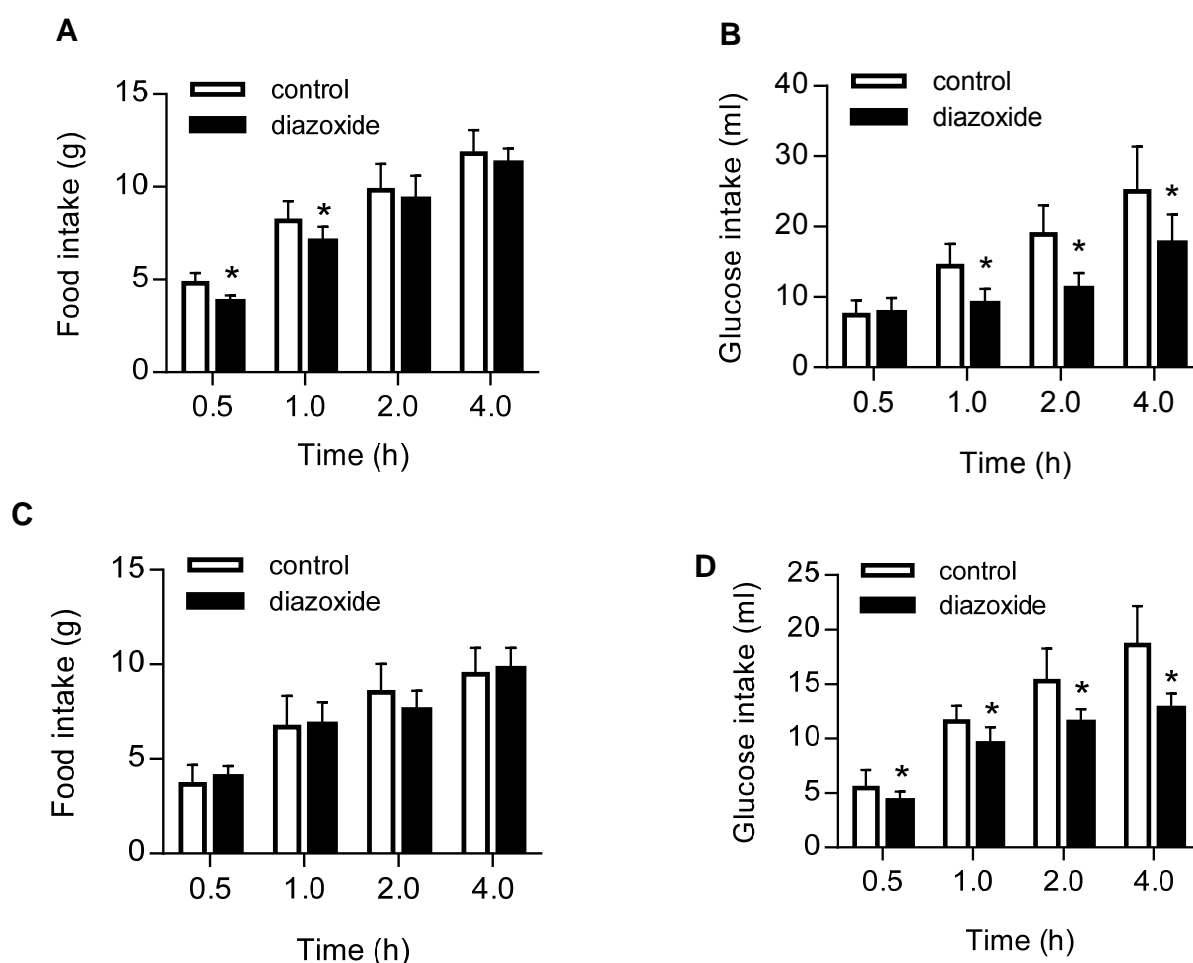

**Supplementary Figure 5.** Effect of intra arcuate injection of diazoxide on food intake and glucose appetite with ad libitum access to either normal chow diet or 2% glucose solutions or both chow and glucose

**A** Food intake after injection of 1 nmol diazoxide or vehicle (control) in rats (n=9), when only chow is available

**B** 2% glucose intake after injection of 1 nmol diazoxide or vehicle (control) in rats (n=9), when only glucose is available

**C** Food intake after injection of 1 nmol diazoxide or vehicle (control) in rats (n=9), when both chow and glucose available

**D** 2% glucose intake after injection of 1 nmol diazoxide or vehicle (control) in rats (n=9), when both chow and glucose available

# Supplementary figure 6

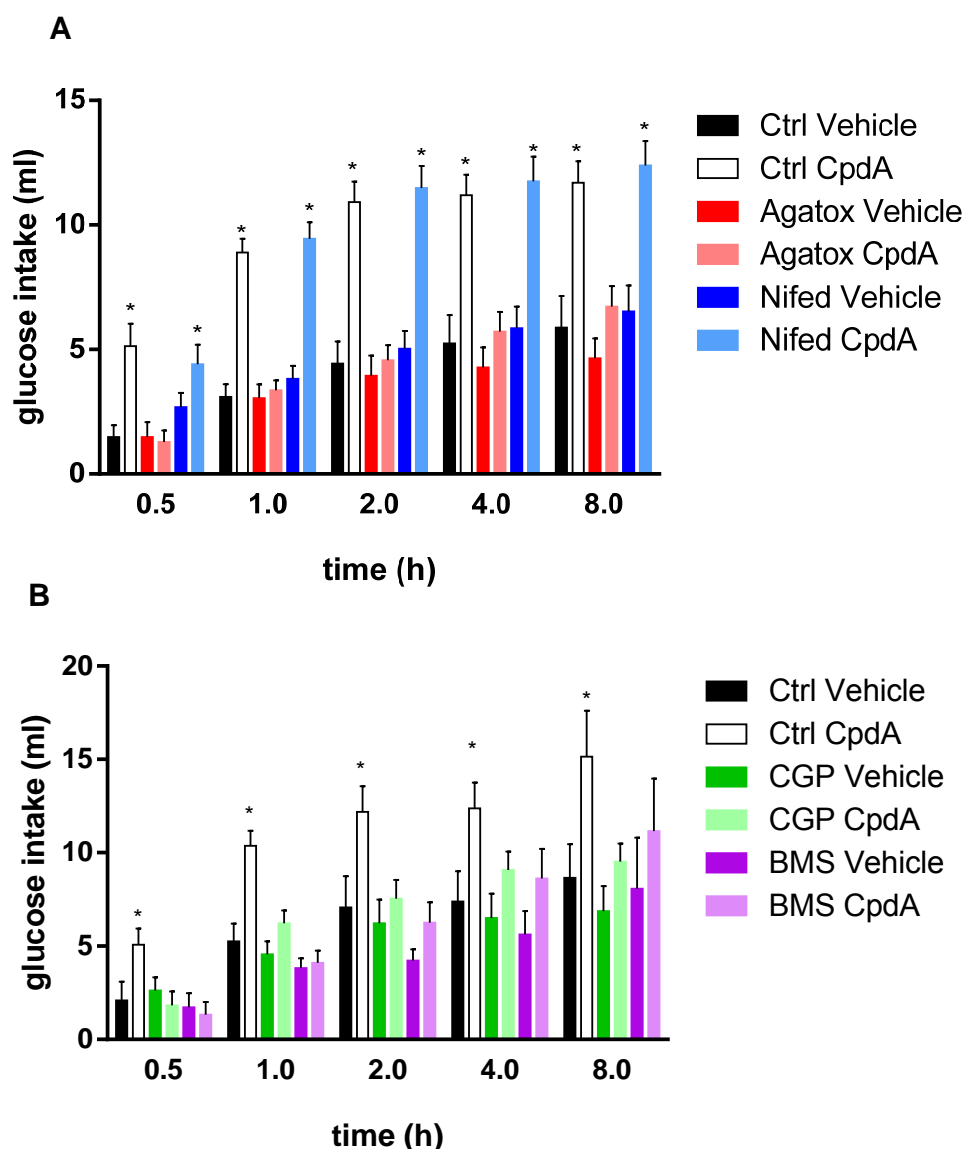

**Supplementary figure 6:** Effect of calcium channel blockers and NPY receptor antagonists on compound A induced glucose intake.

**(A)** 2% w/v glucose solution intake after intra-arcuate injection of nifedipine,  $\omega$ -agatoxin IVA or vehicle and subsequent injection of CpdA or control, in rats time was measured from the end of the second injection (n=15).

**(B)** 2% w/v glucose solution intake after intra-peritoneal injection of BMS-193885, CGP-71683 or vehicle and subsequent intra-arcuate injection of CpdA or control, in rats time was measured from the end of the second injection (n=14) Data presented as mean  $\pm$  s.e.m.

\*P<0.00001 vs corresponding vehicle injected group
